# Supplementary material
Source: Springer Nature journal article supplement (https://www.springermedizin.de/resource/supplementary/12891_2007_515_MOESM2_ESM.pdf/9511210)

**Calcium intake (mg/day)**

3000,00  
2500,00  
2000,00  
1500,00  
1200  
1000,00  
500,00  
0,00

**serum 25-OHD3 (nmol/L)**

75

50,00

100,00

150,00

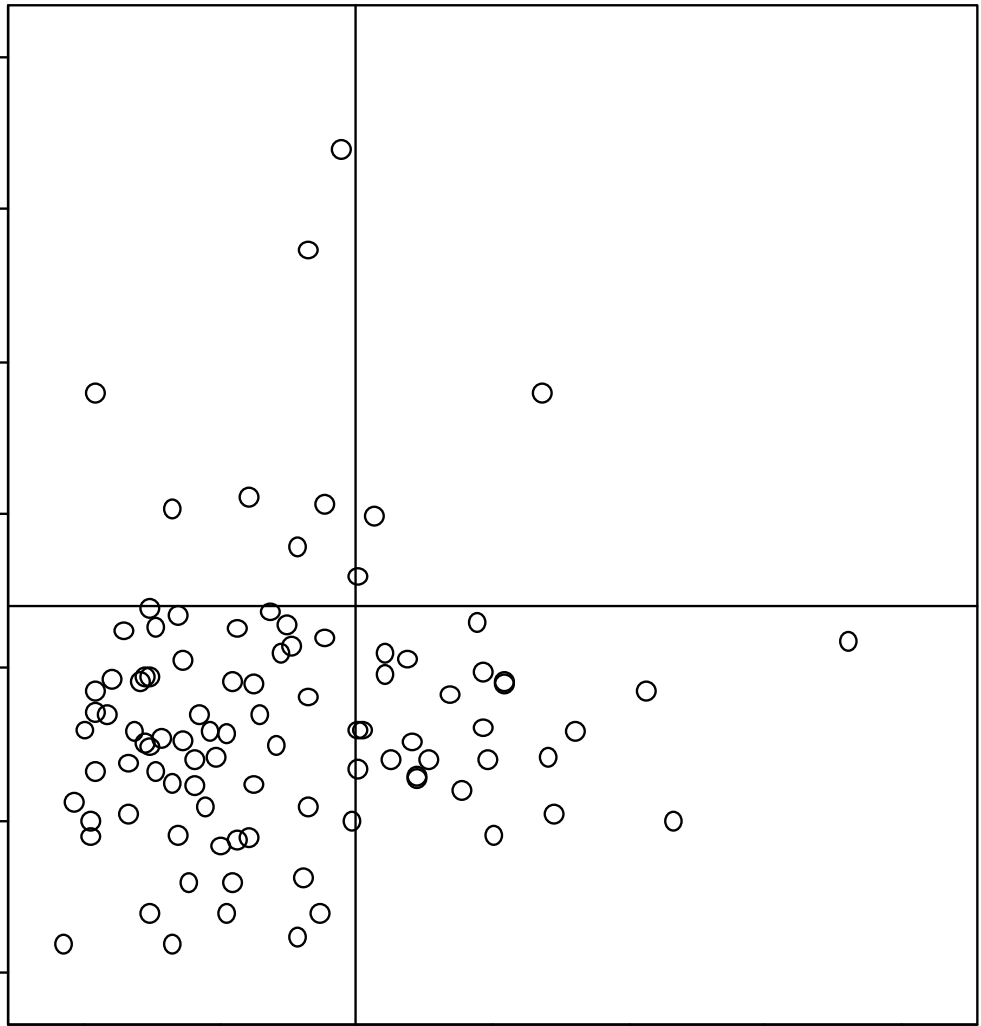

Supplement: MOESM2 [file 9511210]
